# Supplementary material
Source: publisher figshare collection journal article supplement (https://karger.figshare.com/ndownloader/files/6929606)
Supplement: Supplementary file 1 [file 6929606]

| Characteristic | Control  (n=25) | OIT  (n=12) | p-value |
| --- | --- | --- | --- |
| Median age (range), years | 7.3 (5.8-9.7) | 8.3 (6.7-12.8) | 0.142 |
| Male sex | 18 (72.0%) | 6 (50.0%) | 0.274 |
| Past history of anaphylaxis to milk | 18 (72.0%) | 11 (91.7%) | 0.232 |
| AD, current | 12 (48.0%) | 6 (50.0%) | >0.999 |
| BA, current | 7 (28.0%) | 6 (50.0%) | 0.274 |
| AR, current | 5 (20.0%) | 4 (33.3%) | 0.122 |
| Severity of symptoms during OFC | Mild: 1  Moderate: 19  Severe: 5 | Mild: 0  Moderate: 10  Severe: 2 | >0.999 |
| Median threshold of first challenge test (range), g | 2.6 (1.5-3.0) | 1.6 (0.75-3.0) | 0.124 |
| Median milk-specific IgE level (range), Ua/ml | 39.5 (9.8-60.1) | 38.2 (1.7-278) | 0.753 |
| Median casein-specific IgG level (range), mg/L | 7.0 (2.1-36.9) | 5.6 (3.6-15.4) | 0.297 |
| Median milk-specific IgG4 level (range), mg/L | 0.5 (0.1-6.9) | 0.5 (0.2-1.9) | 0.820 |

**Supplementary Table 2. Baseline characteristics of the OIT and Control groups**

OIT, oral immunotherapy; AD, atopic dermatitis; BA, bronchial asthma; AR, allergic rhinitis; OFC, oral food challenge; Ig, immunoglobulin.

Comparisons were made with Fisher's exact test.
